# Supplementary material for: Carbonyl sulfide exchange in soils for better estimates of ecosystem carbon uptake
Source: Copernicus journal article supplement (doi:10.5194/acp-16-3711-2016), 2016-03-21
Supplement: Supplementary file 1 [file acp-16-3711-2016-supplement.pdf]

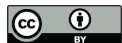

*Supplement of*

## **Carbonyl sulfide exchange in soils for better estimates of ecosystem carbon uptake**

**Mary E. Whelan et al.**

*Correspondence to:* M. E. Whelan (marywhelan@gmail.com)

The copyright of individual parts of the supplement might differ from the CC-BY 3.0 licence.

# 1 Supplemental Material

## 2 Carbonyl sulfide exchange in soils for better estimates of 3 ecosystem carbon uptake

4 M. E. Whelan<sup>1,2</sup>, T. W. Hilton<sup>1</sup>, J. A. Berry<sup>2</sup>, M. Berkelhammer<sup>3</sup>, A. R. Desai<sup>4</sup> and  
5 J. E. Campbell<sup>1</sup>

6 [1]{University of California, Merced, Merced, California}

7 [2]{Carnegie Institution for Science, Stanford, California}

8 [3]{University of Illinois Chicago, Chicago, Illinois}

9 [4]{University of Wisconsin, Madison, Wisconsin}

10 Correspondence to: M.E. Whelan ([marywhelan@gmail.com](mailto:marywhelan@gmail.com))

11

### 12 1 COS ambient mixing ratios and COS net fluxes

13 Previous studies have shown interaction between net fluxes and ambient concentration of  
14 COS is linear (e.g. Conrad, 1994; Kesselmeier et al., 1999). COS soil fluxes have a  
15 demonstrated “compensation point”, the atmospheric concentration of COS where the net flux  
16 of a specific system is 0. At concentrations below the compensation point, net emission to the  
17 atmosphere is observed; net consumption is observed when ambient concentrations are higher  
18 than the compensation point.

19 The COS in laboratory air during the experiments observed by this method was  $510 \pm 80$   
20 parts-per-trillion (ppt). The air actually present in the well-mixed soil incubation chamber,  
21 the mixing ratio observed at the outlet, was  $470 \pm 95$  ppt COS. To calculate the maximum  
22 anticipated effect of this range, we used the maximum slope observed for the linear  
23 relationship described in Kesselmeier et al., (1999) for soils at 17 °C at a specific volumetric  
24 water content:  $F_{\text{uptake}} = 0.006 \times [\text{COS}] - 0.32$ , where soil COS uptake  $F_{\text{uptake}}$ , is reported in  
25  $\text{pmol gram dry soil}^{-1} \text{ hour}^{-1}$  and [COS] is the mixing ratio of COS in parts-per-trillion (ppt).  
26 The variability of COS mixing ratios in the soil chamber calculated by this method would  
27 cause a variability of  $\pm 0.019 \text{ pmol gram dry soil}^{-1} \text{ min}^{-1}$ . By our simplified scaling presented  
28 in Section 2.2, this translates to  $4.1 \text{ pmol m}^{-2} \text{ sec}^{-1}$ .

## 1 1.2 Discussion of variability in Figure 6

2 We believe that the variability in fluxes due to changes in soil moisture in Fig. 6 mask the  
3 effect of changes in COS chamber mixing ratios. The experiment depicted in Figure 6 aimed  
4 to qualitatively describe what happens to COS fluxes after water is added to soil at a constant  
5 temperature. Transitions in soil moisture are difficult to characterize: some soil samples show  
6 little change in COS fluxes after water addition, while others exhibit a COS “pulse” (see  
7 Figure 7 in the manuscript). In Kesselmeier et al., (1999), the authors used the mole fraction  
8 of COS exiting the incubation chamber as a measure of the well-mixed ambient environment  
9 actually experienced by the soil. The relationship between the observed soil COS fluxes after  
10 soil moisture change and COS mixing ratio exiting the chamber is depicted in Figure S1; all  
11 incubations depicted took place at 20 °C.

12 If the controlling variable of the net fluxes in Figure S1 was ambient COS, one would expect  
13 a strong inverse linear relationship, where higher concentrations of COS result in higher  
14 uptake of COS at a particular soil moisture state. Instead, at first glance, we see a positive  
15 relationship between COS mole fraction and COS flux. This is not surprising because higher  
16 soil COS production leads to more COS leaving the chamber. Perhaps there is a dampening  
17 effect on COS fluxes, where net COS production by soils increases soil COS consumption,  
18 but the overall effect is overwhelmed by high COS production. In other words, the net  
19 production reported here may be in reality higher at the lower ambient COS mixing ratios that  
20 would be encountered by unenclosed soils in the field.

21 High COS production does not appear to obscure the relationship between COS ambient  
22 mixing ratios and COS uptake. As a thought exercise to demonstrate this, we separated out  
23 the COS production component from fluxes of soy field soil, shown in Figure 7 in the main  
24 text. When soils were air-dried then incubated, a net COS emission was observed with an  
25 exponential relationship to temperature ranging from 10 to 40 °C for all the samples except  
26 the desert soil.

$$27 \quad F_{\text{production}} = A \times \exp[B \times T] \quad (\text{S2})$$

28  $F_{\text{production}}$  is the production of COS in the assumed absence of COS consumption,  $T$  is the  
29 incubation temperature in °C, while  $A$  and  $B$  are fitting parameters found using least squares  
30 regression. This curve was generated for all soil types investigated other than the desert soils,  
31 though we did not generate enough data for savannah soils, shown in Figure S3 and Table S1.

1 Correcting for COS production in this way does not change the overall relationship between  
2 incubation COS mole fraction and observed COS fluxes. The production of COS is assumed  
3 to be insensible to the concentration of COS the soil experiences, depending here only on  
4 temperature. Examining Fig. S2, the correction for abiotic production at 20 °C is a small  
5 portion of the overall magnitude of the fluxes. Using this purposefully simple model (Eq. S1)  
6 to subtract out the effects of COS production vertically shifts the data and does not change the  
7 slope of the relationship, shown in Fig. S3.

## 8 **2 COS mixing ratios and COS production**

9 To explore the sensitivity of COS uptake to chamber COS mole fractions further, we  
10 performed a series of incubations with a freshly collected soil from near the original soy field  
11 site (Fig. S4). The soil was air-dried to approximately 2% VWC then incubated with ambient  
12 sweep air, as before, and COS-free zero air containing 300 ppm CO<sub>2</sub> and no detectable COS.  
13 The difference between the two treatments characterizes the effect of COS concentration on  
14 observed COS fluxes. If the response is linear, only two points are needed to extrapolate the  
15 appropriate curve.

16 The difference between the two exponential curves in Fig S5a suggests that some of the COS  
17 produced when the very dry soil was heated got taken up by other processes in the soil. With  
18 this simple experiment, it is impossible to confirm whether an adsorption/desorption  
19 mechanism is responsible.

20 The slopes of the linear regression lines in Fig. S4b and Fig. S5a represent the change in COS  
21 flux divided by the change in ambient COS. Slopes are all negative and become  
22 monotonically steeper as temperature increases. Under ambient and zero air treatments, the  
23 soil sample showed exponentially higher net COS emissions with temperature. Apparent  
24 uptake increased with more available COS in the headspace. In Kesselmeier et al., (1999), a  
25 similar relationship was found with soils that generally exhibited net COS uptake; however,  
26 the maximum slope occurred at 17 °C rather than at the maximum incubation temperature.

27 The linear regression intercepts in Fig S5b and graphed separately in Fig. S6b represent the  
28 theoretical flux we would expect if there were no COS in the chamber at all. This soil sample  
29 exhibited net emissions of COS at all temperatures, so the headspace always contained some  
30 small amount. We would expect the intercepts to have an exponential relationship with  
31 temperature, just as soil observations have exponentially increasing production as the  
32 incubation chamber was heated.

1

2 **3 Conclusions**

3 Understanding soil COS uptake processes still requires considerable work. The soil samples  
4 in this study were incubated under flowing . The soil and headspace air were assumed to be  
5 in equilibrium after 30 minutes. If that were true, adsorption and desorption should no longer  
6 contribute to the soil flux: equal amounts of COS should adsorb and desorb. The uptake  
7 difference between the zero air and ambient air treatments in Fig. S4 indicate that some  
8 uptake process was affecting net soil fluxes, even in a very dry soil.

9 **References**

10 Conrad, R.: Compensation concentration as critical variable for regulating the flux of  
11 trace gases between soil and atmosphere, *Biogeochemistry*, 27(3), 155–170,  
12 doi:10.1007/BF00000582, 1994.

13 Kesselmeier, J., Teusch, N. and Kuhn, U.: Controlling variables for the uptake of  
14 atmospheric carbonyl sulfide by soil, *J. Geophys. Res.*, 104(D9), 11577–11584,  
15 doi:10.1029/1999JD900090, 1999.

16

17

1 Table S1. The fitting parameters for air-dried soils versus temperature, found by least squares  
2 regression curve fitting to Eq. 2.

3

| Soil ID          | Parameter A | Parameter B |
|------------------|-------------|-------------|
| Soy field        | -6.12       | 0.096       |
| temperate forest | -7.77       | 0.119       |
| savannah         | -9.54       | 0.108       |
| rainforest       | -8.2        | 0.101       |

4

5

1

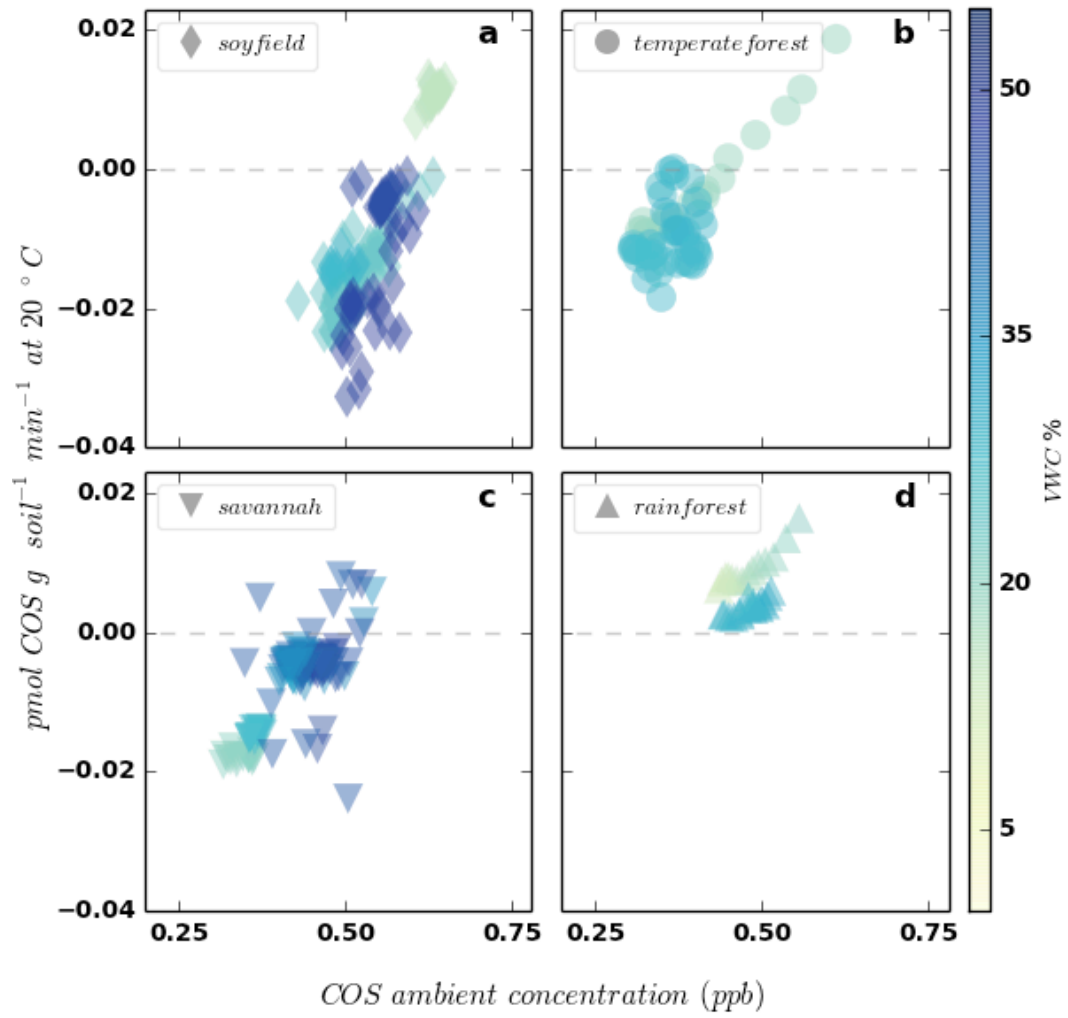

2

3 Figure S1. The concentration of COS exiting the incubation chamber versus COS fluxes after  
4 water addition at 20 °C.

5

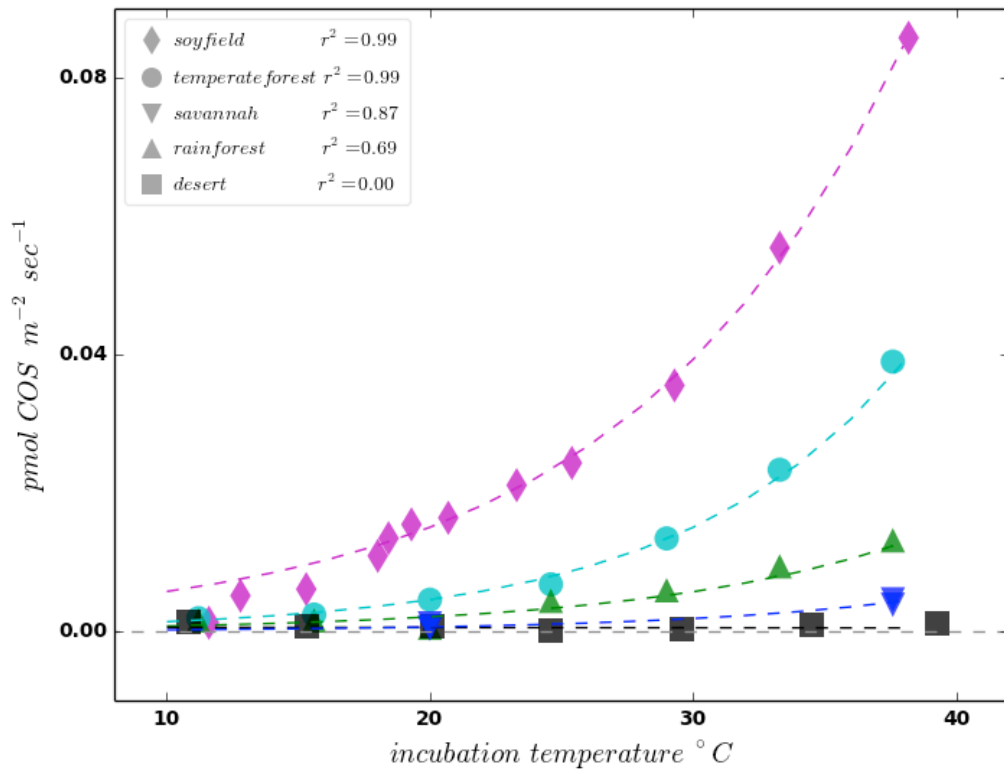

1

2 Figure S2. Observations of COS fluxes from air-dried soils over a range of temperatures. Air-  
 3 dried soils are assumed to experience negligible COS uptake, the net fluxes here assumed to  
 4 be soil COS production only. Eq. 2 was used to curve-fit the relationship between  
 5 temperature and soil COS production. The  $r^2$  values of this attempt are shown in the figure  
 6 legend.

7



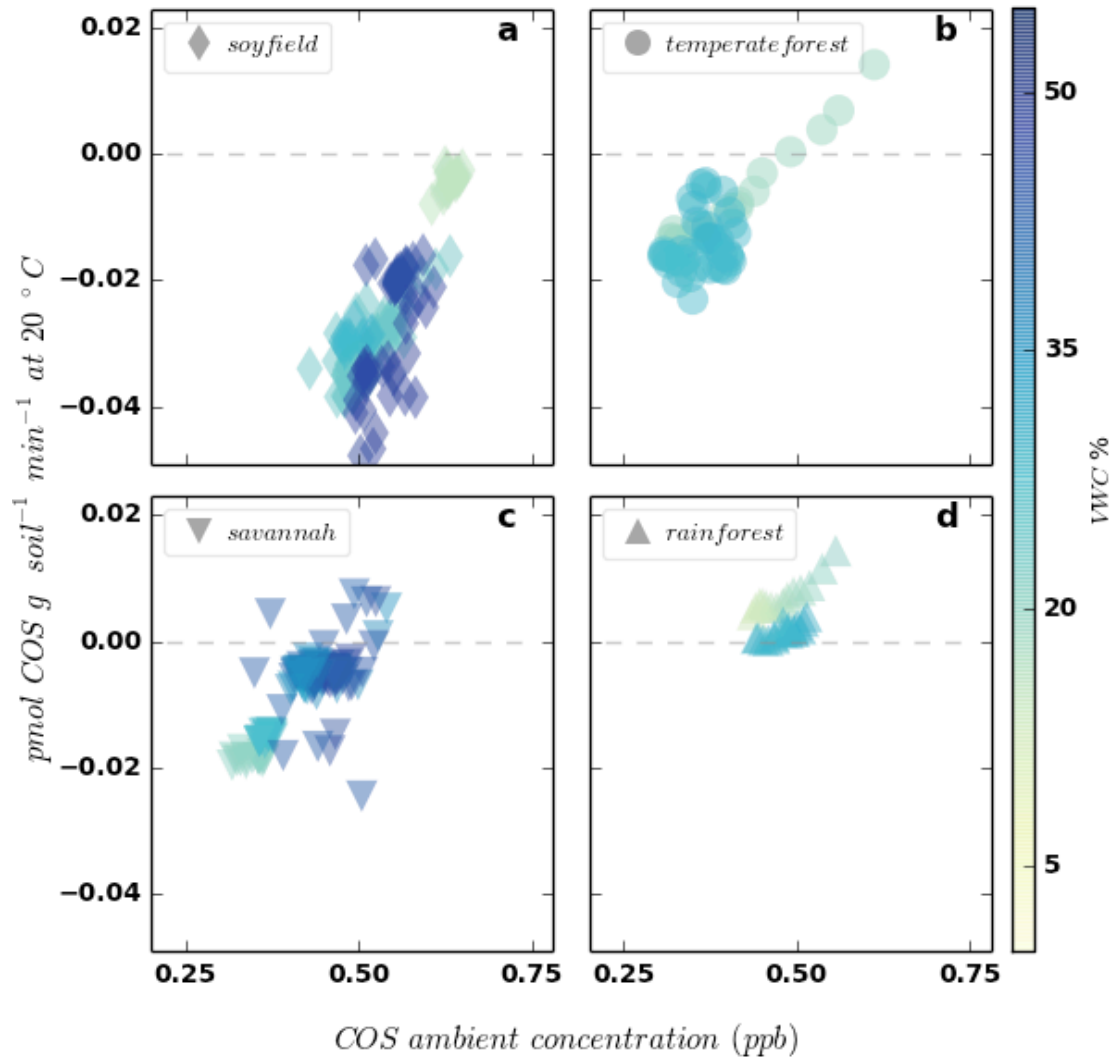

1

2 Fig. S3. Soil COS mole fractions and soil COS flux after water addition at 20 °C subtracted  
 3 by anticipated COS production from Fig. S3.

4

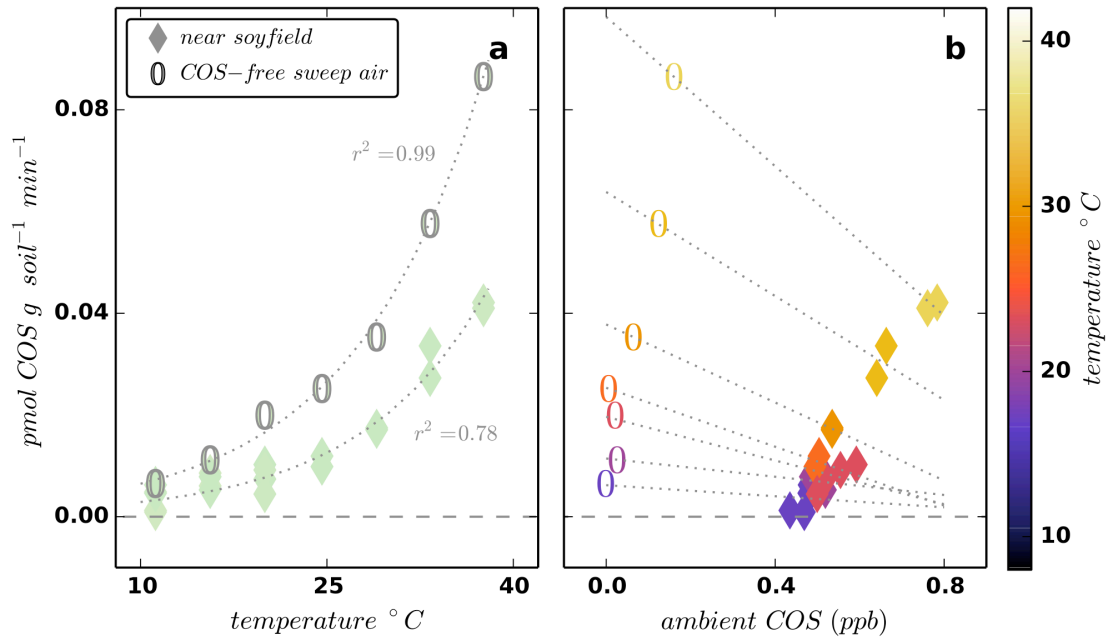

1

2 Fig. S4. Net COS exchange over temperature from a soil sample taken near the original soy  
 3 field site: fluxes observed under ambient sweep air and COS-free sweep air conditions with  
 4 exponential least squared regression lines (a); the relationship between ambient chamber COS  
 5 concentrations and observed fluxes with linear least squared regression lines (b).

6

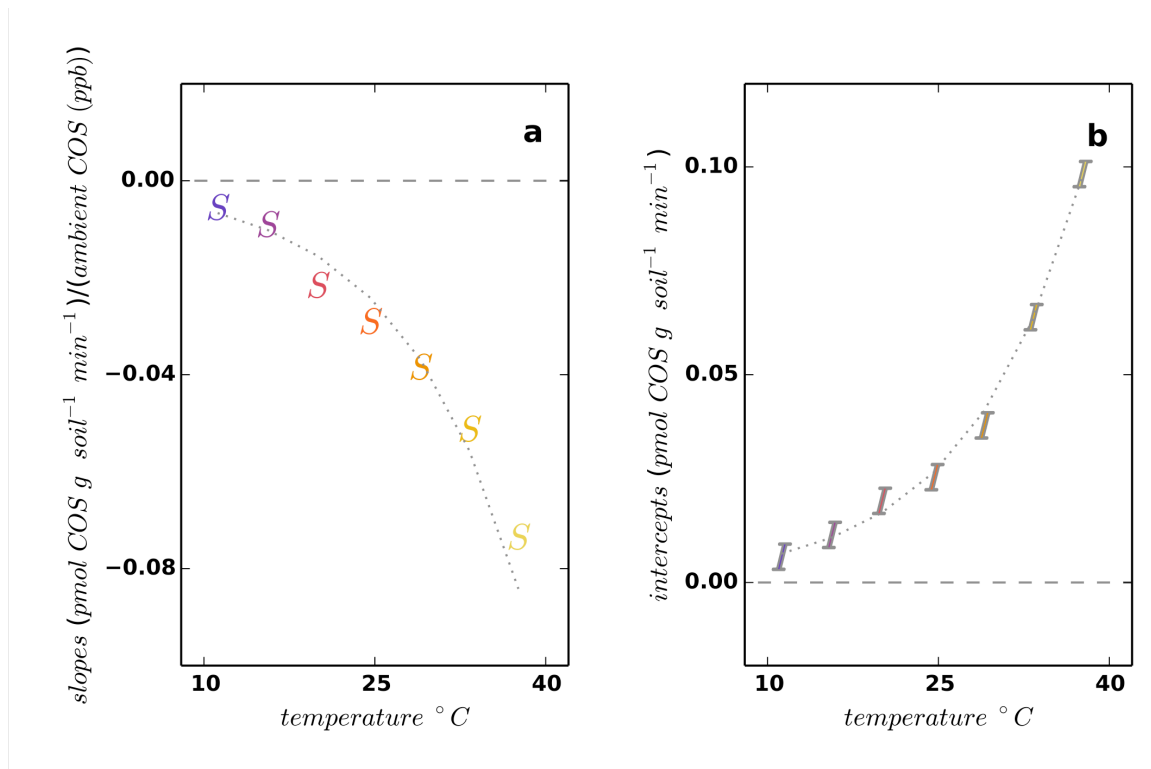

1  
 2 Figure S5. Slopes (a) and intercepts (b) of the linear least squared regression lines in Fig. S5b  
 3 and their exponential linear least squared regression relationship with incubation temperature.  
 4
